# Supplementary material for: Expression of MicroRNAs in the Stem Cell Niche of the Adult Mouse Incisor
Source: PLOS journal article supplement (doi:10.1371/journal.pone.0024536), 2011-09-08
Supplement: S1 (10.1371/journal.pone.0024536.s001) [file journal.pone.0024536.s001]

**Table S1. Summary of differentially expressed miRNAs in IaCL and liCL.**

| Symbol    | Function                                                                                                                                                                                                                                                                                                                         | References |
|-----------|----------------------------------------------------------------------------------------------------------------------------------------------------------------------------------------------------------------------------------------------------------------------------------------------------------------------------------|------------|
| miR-31*   | Unknown function.                                                                                                                                                                                                                                                                                                                |            |
| miR-31    | miR-31 controls hair cycle-related changes and negatively regulates expression of Fgf10. miR-31 also acts as an oncogenic miRNA (oncomir) in lung cancer by targeting specific tumor suppressors for repression.                                                                                                                 | [1,2]      |
| miR-708*  | Unknown function.                                                                                                                                                                                                                                                                                                                |            |
| miR-96    | Member of the miR-183~182 cluster. Cluster comprises miR-96, -182, and -183. miR-96 suppresses KRAS and functions as a tumor suppressor in pancreatic cancer.                                                                                                                                                                    | [3]        |
| miR-429   | Member of the miR-200 family (i.e. miR-200a, 200b, 200c, 141, and 429). miR-200 family members regulate epithelial-mesenchymal transition (EMT) by downregulating ZEB1 and ZEB2, which are repressors of E-cadherin. Overexpression of miR-429 leads to mesenchymal to epithelial transition in metastatic ovarian cancer cells. | [4-7]      |
| miR-200a  | Member of the miR-200 family. See miR-429. Unknown function.                                                                                                                                                                                                                                                                     |            |
| miR-455*  | Unknown function.                                                                                                                                                                                                                                                                                                                |            |
| miR-205   | Over-expression of miR-205 leads to decreased cell size and increased proliferation in mammary epithelial cell progenitors. miR-205 targets include PTEN, ZEB1, and ZEB2.                                                                                                                                                        | [5,8]      |
| miR-203   | miR203 regulates p63, a member of the p53 family that regulates morphogenesis of ectodermal derivatives such as skin, hair, and teeth. Overexpression of miR-203 leads to decreased clonogenic capacity of skin stem cells in culture, restricts proliferation, and induces cell cycle exit.                                     | [9,10]     |
| miR-200a* | Member of the miR-200 family. Unknown function.                                                                                                                                                                                                                                                                                  |            |
| miR-200c  | Member of the miR-200 family. See miR-429. miR-200c regulates the induction of apoptosis by targeting FAP. Along with miR141, inhibits JAG1.                                                                                                                                                                                     | [7,11]     |
| miR-182   | Member of the miR-183~182 cluster. Cluster comprises miR-96, -182, and -183. miR-182 mediates the downregulation of BRCA1 and impairs DNA repair. Also, the specific inhibition of miR-182 in helper T lymphocytes limits their population expansion <i>in vivo</i> and <i>in vitro</i> .                                        | [12,13]    |
| miR-183   | Member of the miR-183~182 cluster. Cluster comprises miR-96, -182, and -183. miR-183 targets integrin $\beta 1$ ( <i>ITGB1</i> ) and kinesin 2 $\alpha$ ( <i>KIF2A</i> ), and may be involved in the development and function in neurosensory organs.                                                                            | [14]       |
| miR-200b  | Member of the miR-200 family. See miR-429. The miR-200b-Suz12-E-cadherin pathway is important for cancer stem cell growth and its transcriptional signature is observed in metastatic breast tumors.                                                                                                                             | [15]       |
| miR-326   | miR-326 regulates interleukin-17 producing T-helper cells and is involved in the pathogenesis of multiple sclerosis.                                                                                                                                                                                                             | [16]       |
| miR-200b* | Member of the miR-200 family. Unknown function.                                                                                                                                                                                                                                                                                  |            |
| miR-183*  | Unknown function.                                                                                                                                                                                                                                                                                                                |            |
| miR-708*  | Unknown function.                                                                                                                                                                                                                                                                                                                |            |
| miR-211   | miR-211 is a suppressor of melanoma invasion. Also, the over-expression of miR-211 increased proliferation, migration, and anchorage-independent colony formation of oral carcinoma cells.                                                                                                                                       | [17,18]    |
| miR-222   | miR-221/222 targets the tumor suppressor, p27/Kip1, and affects proliferative potential of various cells.                                                                                                                                                                                                                        | [19,20]    |
| miR-140*  | Unknown function.                                                                                                                                                                                                                                                                                                                |            |
| miR-23a   | The miR-23a~27a~24-2 cluster is downregulated by Runx2 and the cluster represses translation of Runx2 and Satb2 during osteoblast differentiation.                                                                                                                                                                               | [21]       |
| miR-551b  | Unknown function.                                                                                                                                                                                                                                                                                                                |            |
| miR-652   | Unknown function.                                                                                                                                                                                                                                                                                                                |            |
| miR-199b* | Unknown function.                                                                                                                                                                                                                                                                                                                |            |
| miR-214*  | Unknown function.                                                                                                                                                                                                                                                                                                                |            |
