# Supplementary material for: Expression of MicroRNAs in the Stem Cell Niche of the Adult Mouse Incisor
Source: PLOS journal article supplement (doi:10.1371/journal.pone.0024536), 2011-09-08
Supplement: S2 (10.1371/journal.pone.0024536.s002) [file journal.pone.0024536.s002]

**Table S2. Summary of differentially expressed miRNAs in Am vs IaCL.**

| Symbol      | Function                                                                                                                                                                                                                                                                                                                                                                       | References |
|-------------|--------------------------------------------------------------------------------------------------------------------------------------------------------------------------------------------------------------------------------------------------------------------------------------------------------------------------------------------------------------------------------|------------|
| miR-138*    | Unknown function.                                                                                                                                                                                                                                                                                                                                                              |            |
| miR-141     | Member of the miR-200 family (i.e. miR-200a, 200b, 200c, 141, and 429). Along with miR-200c, inhibits JAG1.                                                                                                                                                                                                                                                                    | [7]        |
| miR-148b    | Unknown function.                                                                                                                                                                                                                                                                                                                                                              |            |
| miR-200b*   | Member of the miR-200 family. Unknown function.                                                                                                                                                                                                                                                                                                                                |            |
| miR-338-3p  | miR-338-3p and miR-451 are necessary for the development of epithelial cell polarity.                                                                                                                                                                                                                                                                                          | [22]       |
| miR-200a    | Member of the miR-200 family. See Table 1.                                                                                                                                                                                                                                                                                                                                     |            |
| miR-200c    | Member of the miR-200 family. See Table 1.                                                                                                                                                                                                                                                                                                                                     |            |
| miR-181b    | Over-expression of miR-21, miR-181b and miR-345 is associated with the progression of leukoplakia to oral carcinoma.                                                                                                                                                                                                                                                           | [23]       |
| miR-181a-1* | Unknown function.                                                                                                                                                                                                                                                                                                                                                              |            |
| miR-181a    | miR-181a is downregulated by phospho (p)- $\Delta$ Np63 $\alpha$ ; downregulates K-ras and shows tumor suppressive effects against oral squamous cell carcinoma cells; and is an intrinsic modulator of T cell sensitivity and selection.                                                                                                                                      | [24-26]    |
| miR-138     | miR-138 is required for the proper expression patterns of genes such as aldehyde dehydrogenase-1a2 and versican in zebrafish heart.                                                                                                                                                                                                                                            | [27]       |
| miR-200c*   | Member of the miR-200 family. Unknown function.                                                                                                                                                                                                                                                                                                                                |            |
| miR-22*     | Unknown function.                                                                                                                                                                                                                                                                                                                                                              |            |
| miR-429     | Member of the miR-200 family. See Table 1.                                                                                                                                                                                                                                                                                                                                     |            |
| miR-338-5p  | Unknown function.                                                                                                                                                                                                                                                                                                                                                              |            |
| miR-200a*   | Member of the miR-200 family. Unknown function.                                                                                                                                                                                                                                                                                                                                |            |
| miR-141*    | Unknown function.                                                                                                                                                                                                                                                                                                                                                              |            |
| miR-33*     | Unknown function.                                                                                                                                                                                                                                                                                                                                                              |            |
| miR-455*    | Unknown function.                                                                                                                                                                                                                                                                                                                                                              |            |
| miR-181c    | miR-181c targets interleukin-2 in activated CD4(+) T lymphocytes.                                                                                                                                                                                                                                                                                                              | [28]       |
| miR-151-5p  | miR-151-5p increases hepatocellular carcinoma (HCC) cell migration and invasion in vivo and in vitro. miR-151-5p directly targets RhoGDI $\alpha$ , a putative metastasis suppressor in HCC, leading to the activation of Rac1, Cdc42 and Rho GTPases.                                                                                                                         | [29]       |
| miR-154     | Unknown function.                                                                                                                                                                                                                                                                                                                                                              |            |
| miR-127     | Member of the miR-127~433 cluster. Unknown function.                                                                                                                                                                                                                                                                                                                           |            |
| miR-434-3p  | Unknown function.                                                                                                                                                                                                                                                                                                                                                              |            |
| miR-99b     | Unknown function.                                                                                                                                                                                                                                                                                                                                                              |            |
| miR-329     | Member of the miR379-410 cluster. Cluster comprises 50 miRNAs. Unknown function.                                                                                                                                                                                                                                                                                               |            |
| miR-193b    | miR-193b represses cell proliferation during melanoma development.                                                                                                                                                                                                                                                                                                             | [30]       |
| miR-299*    | Unknown function.                                                                                                                                                                                                                                                                                                                                                              |            |
| miR-92a     | Member of the miR-17-92 cluster. Cluster comprises miR-17-5p and -3p, miR-18a, miR-19a and b, miR-20a and miR-92a. Unknown function.                                                                                                                                                                                                                                           |            |
| miR-127*    | Unknown function.                                                                                                                                                                                                                                                                                                                                                              |            |
| miR-199b*   | Unknown function.                                                                                                                                                                                                                                                                                                                                                              |            |
| miR-379     | Unknown function.                                                                                                                                                                                                                                                                                                                                                              |            |
| let-7e      | Although let-7e has not yet been studied, let-7 family members target many genes important for stem cells, including <i>Hmga2</i> .                                                                                                                                                                                                                                            | [31,32]    |
| miR-145     | Member of the miR-143-145 cluster. miR-145 regulates OCT4, SOX2, and KLF4 and represses pluripotency in human embryonic stem cells; inhibits cell proliferation of human lung adenocarcinoma by targeting EGFR and NUDT1. miR-143-145 cluster plays a critical role during smooth muscle cell differentiation, and is repressed by KRAS to initiate a tumor-promoting pathway. | [33-36]    |
| miR-143     | Member of the miR-143-145 cluster. miR-143-145 cluster plays a critical role during smooth muscle cell differentiation, and is repressed by KRAS to initiate a tumor-promoting pathway.                                                                                                                                                                                        | [35,36]    |
